# Supplementary material for: Clarifying the Use of Benzylidene Protecting Group for D-(+)-Ribono-1,4-Lactone, an Essential Building Block in the Synthesis of C-Nucleosides
Source: MDPI journal article supplement (doi:10.3390/molecules26216447), 2021-10-26
Supplement: s1 [file s1]

## Supplemental Material

### **Clarifying the use of benzylidene protecting group for D-(+)-ribo-1,4-lactone, an essential building block in the synthesis of C-nucleosides.**

Silvana Casati<sup>1</sup>, Paola Rota<sup>2</sup>, Pietro Allevi<sup>2</sup>, Alessandra Mingione<sup>1</sup>, Roberta Ottria<sup>1\*</sup>, Pierangela Ciuffreda<sup>1</sup>

<sup>1</sup> Dipartimento di Scienze Biomediche e Cliniche "Luigi Sacco", Università degli Studi di Milano, Via G.B. Grassi 74, 20157 Milano, Italy; [silvana.casati@unimi.it](mailto:silvana.casati@unimi.it), [alessandra.mingione@unimi.it](mailto:alessandra.mingione@unimi.it), [roberta.ottria@unimi.it](mailto:roberta.ottria@unimi.it), [pierangela.ciuffreda@unimi.it](mailto:pierangela.ciuffreda@unimi.it)

<sup>2</sup> Dipartimento di Scienze Biomediche, Chirurgiche e Odontoiatriche, Università degli Studi di Milano, Via Saldini 50, 20122 Milano, Italy; [pietro.allevi@unimi.it](mailto:pietro.allevi@unimi.it), [paola.rota@unimi.it](mailto:paola.rota@unimi.it).

#### **Table of Contents**

**<sup>1</sup>H and <sup>13</sup>C-NMR spectra**

Pag. 2-17

**Table S1-S4**

Pag. 18

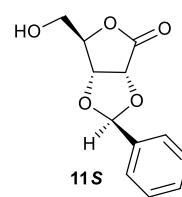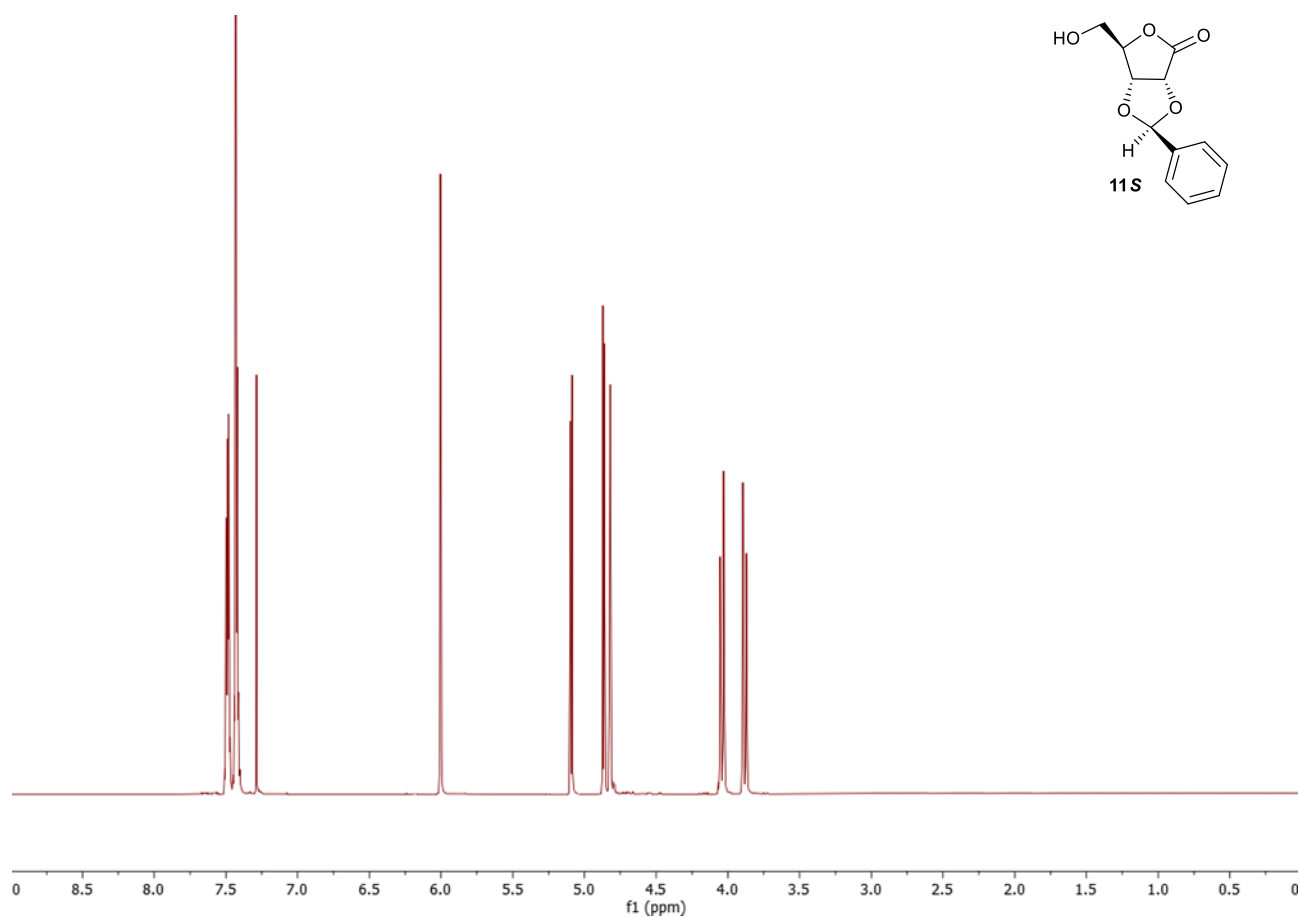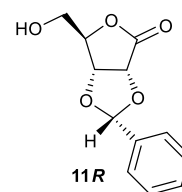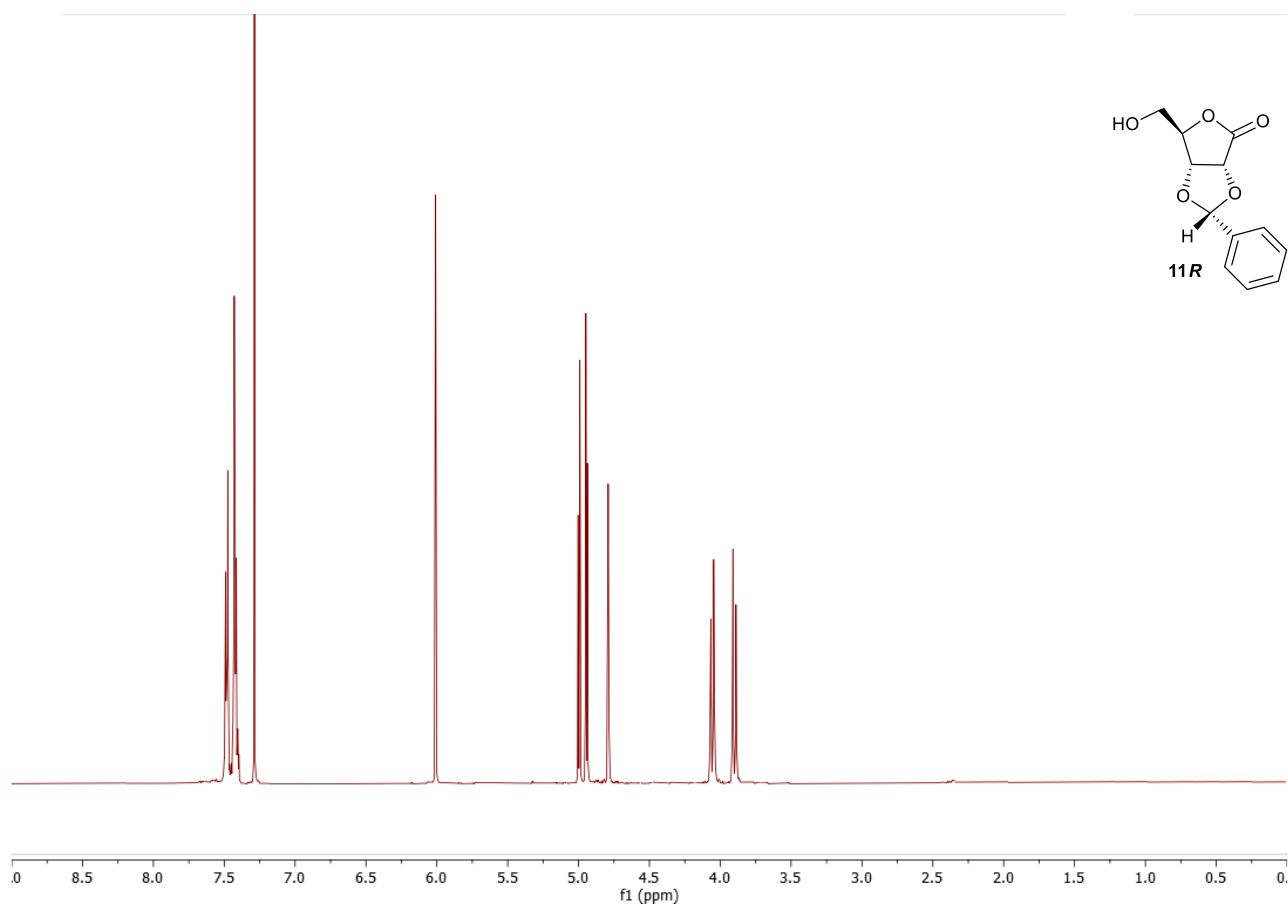

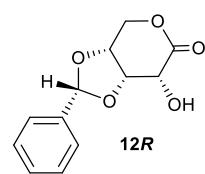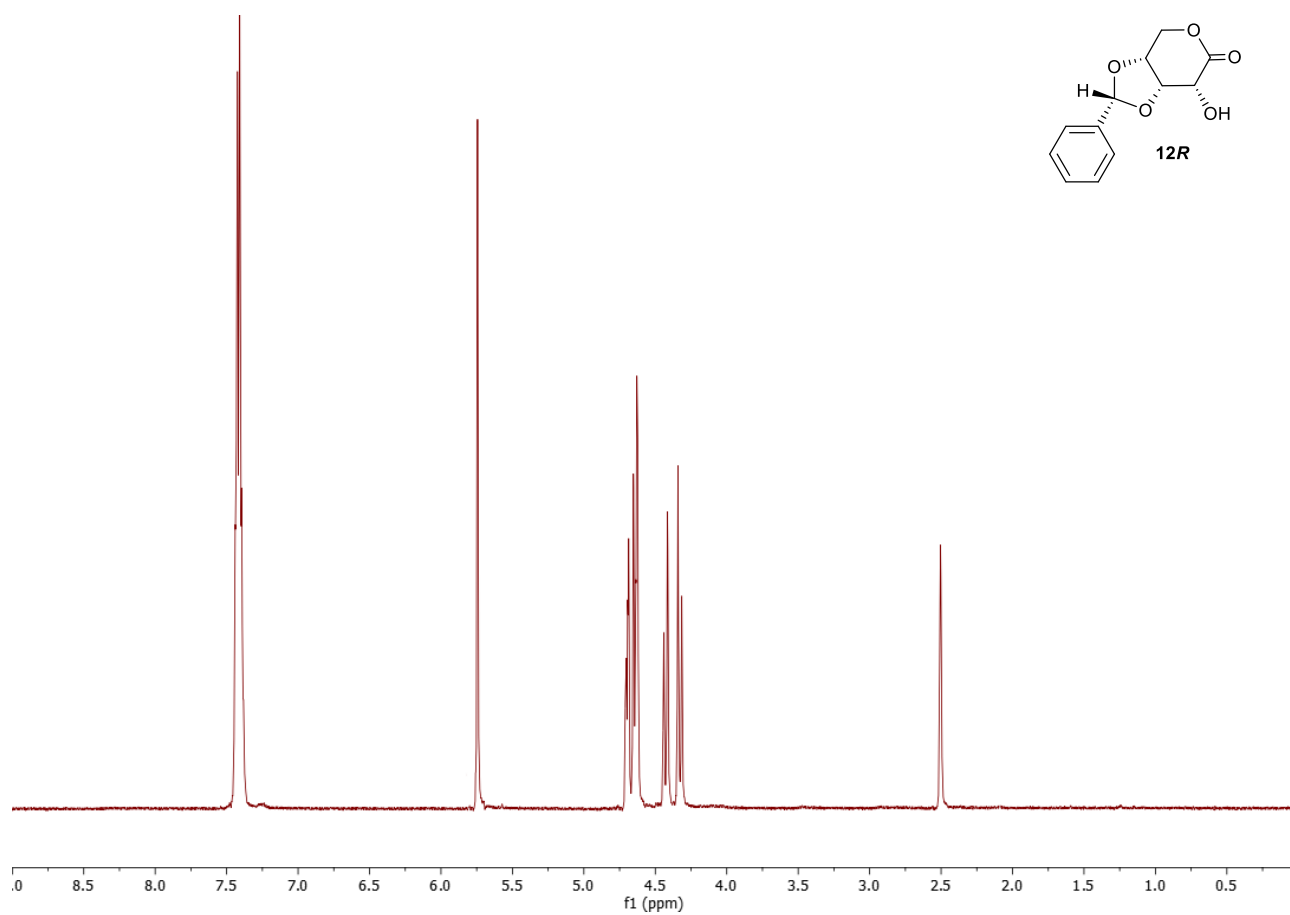

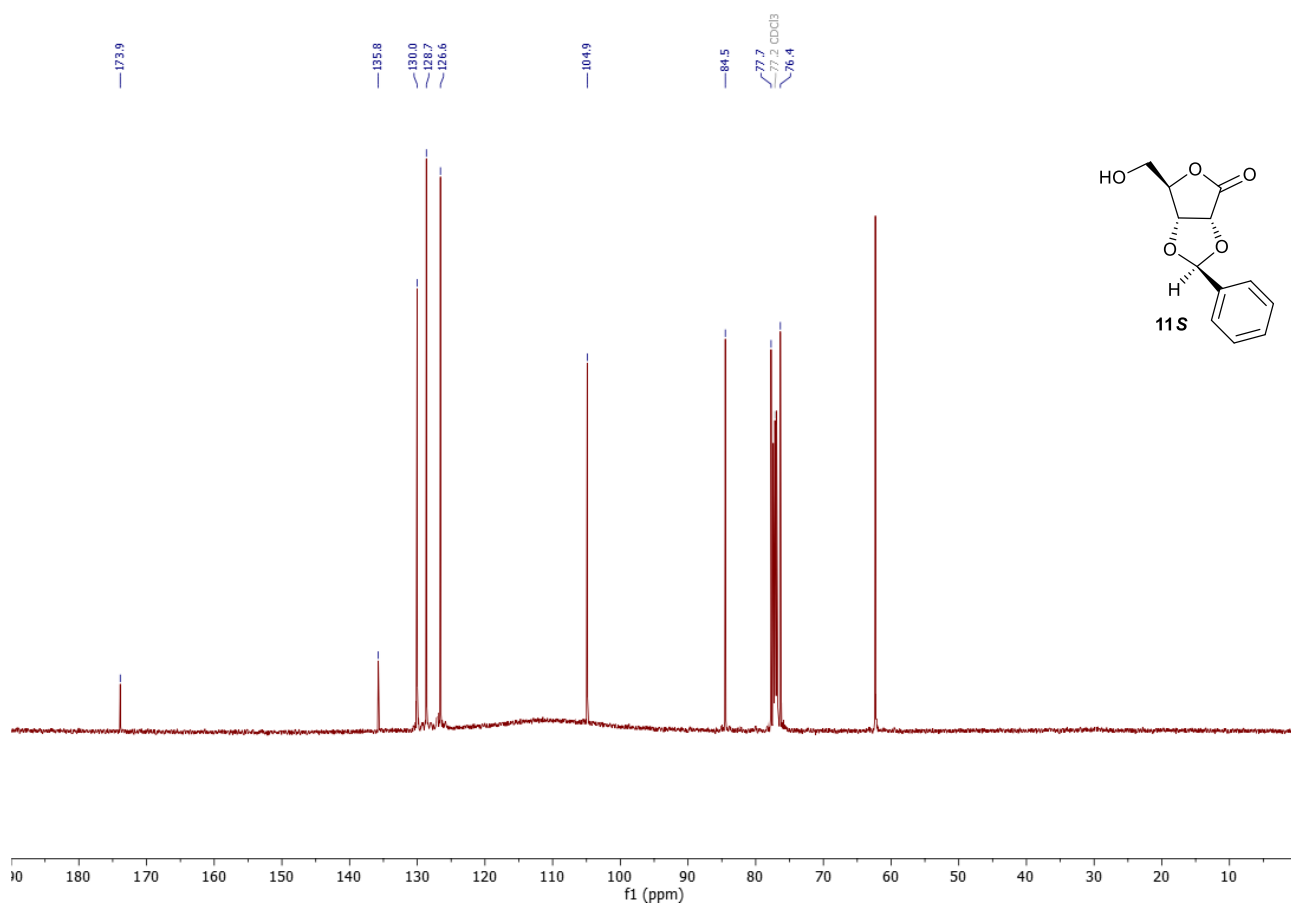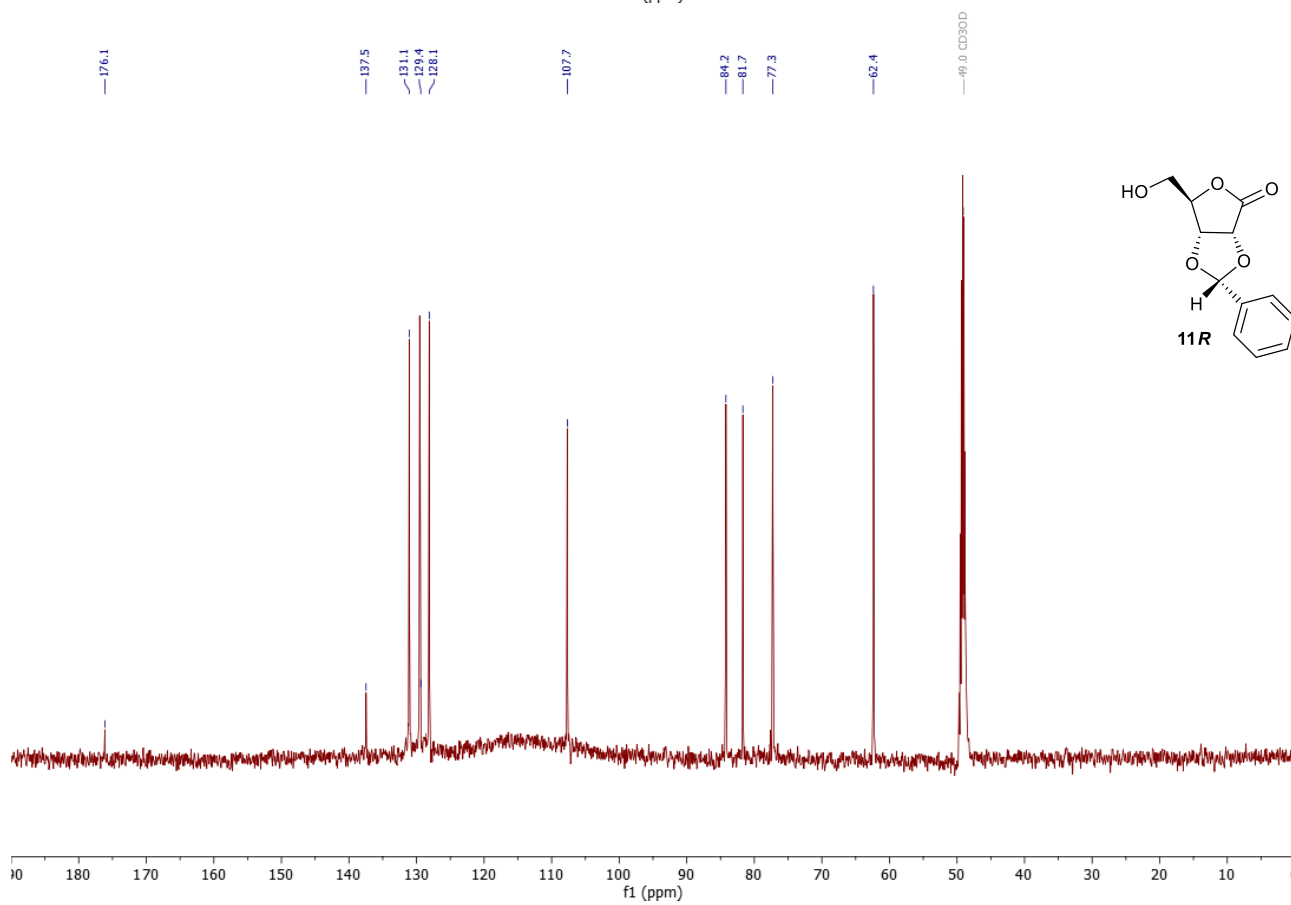

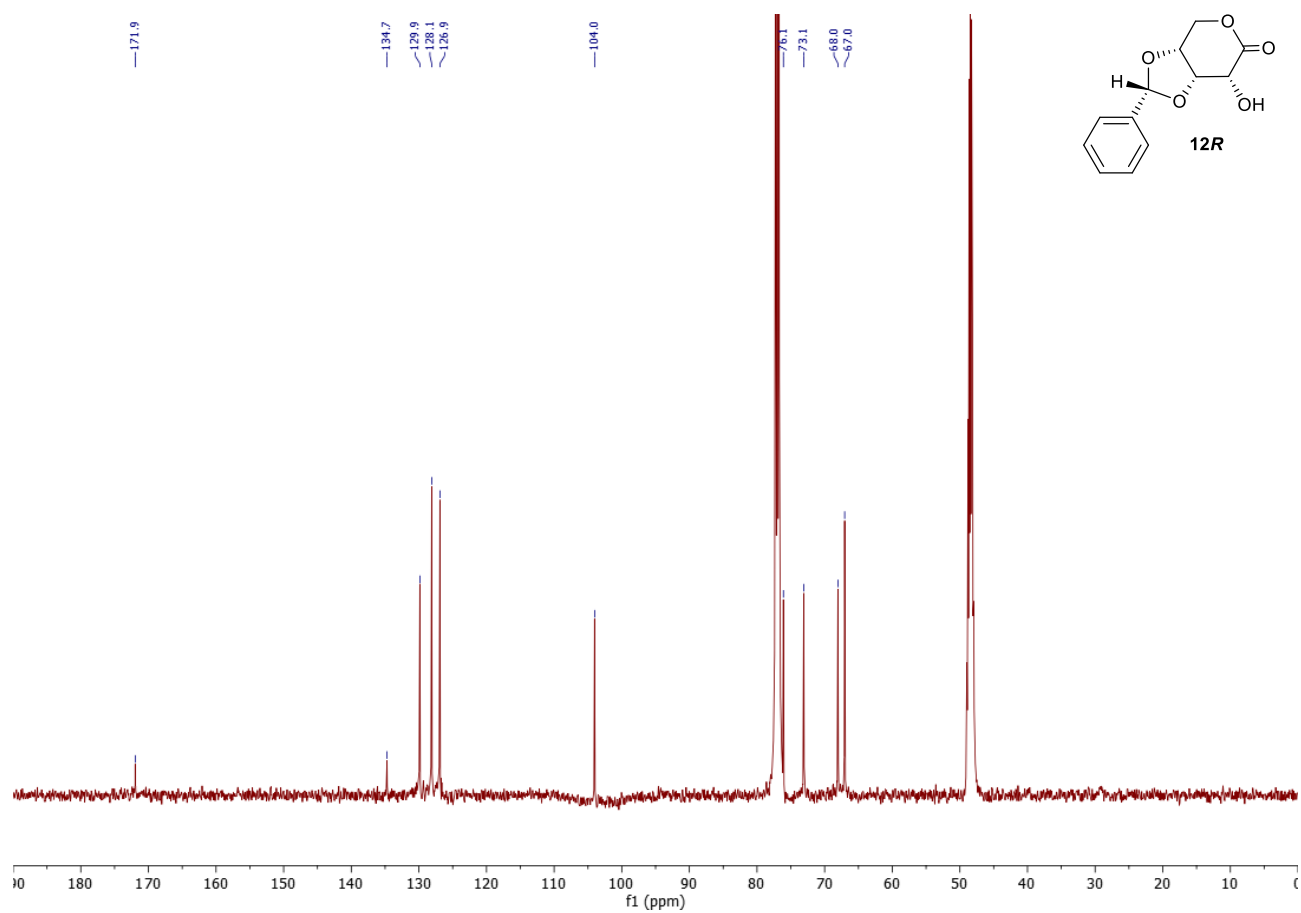

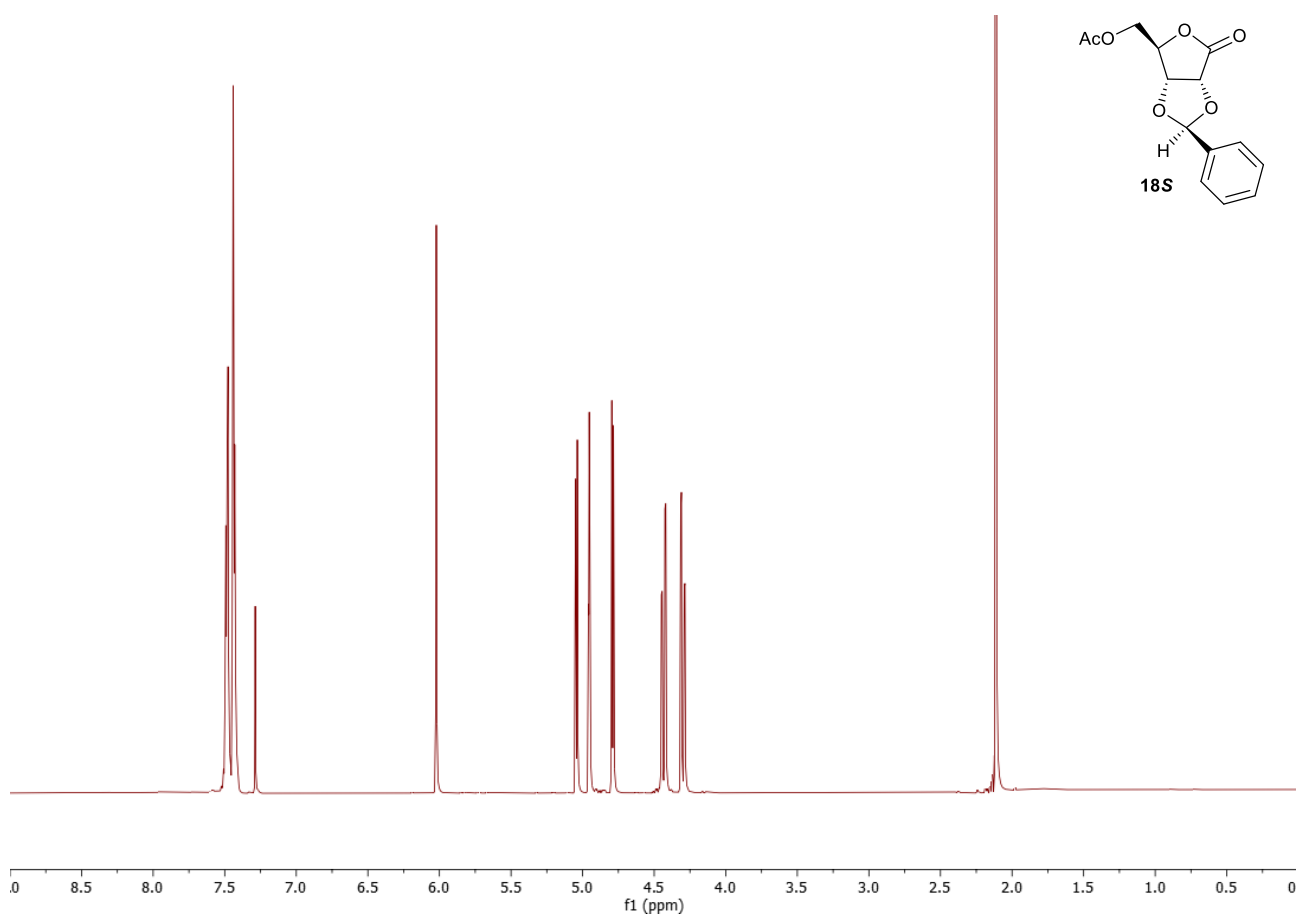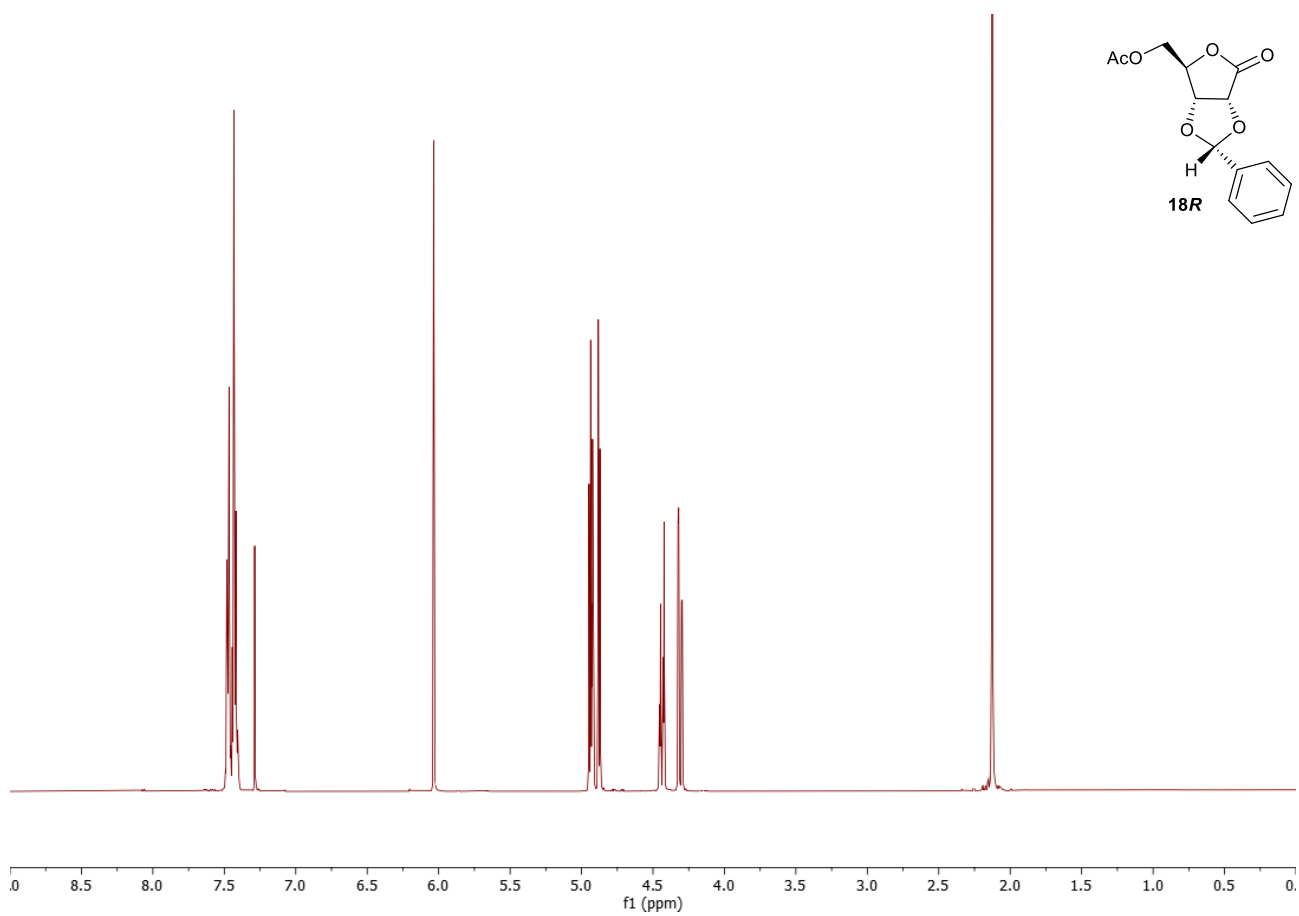

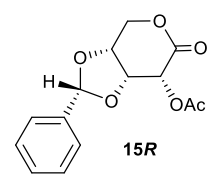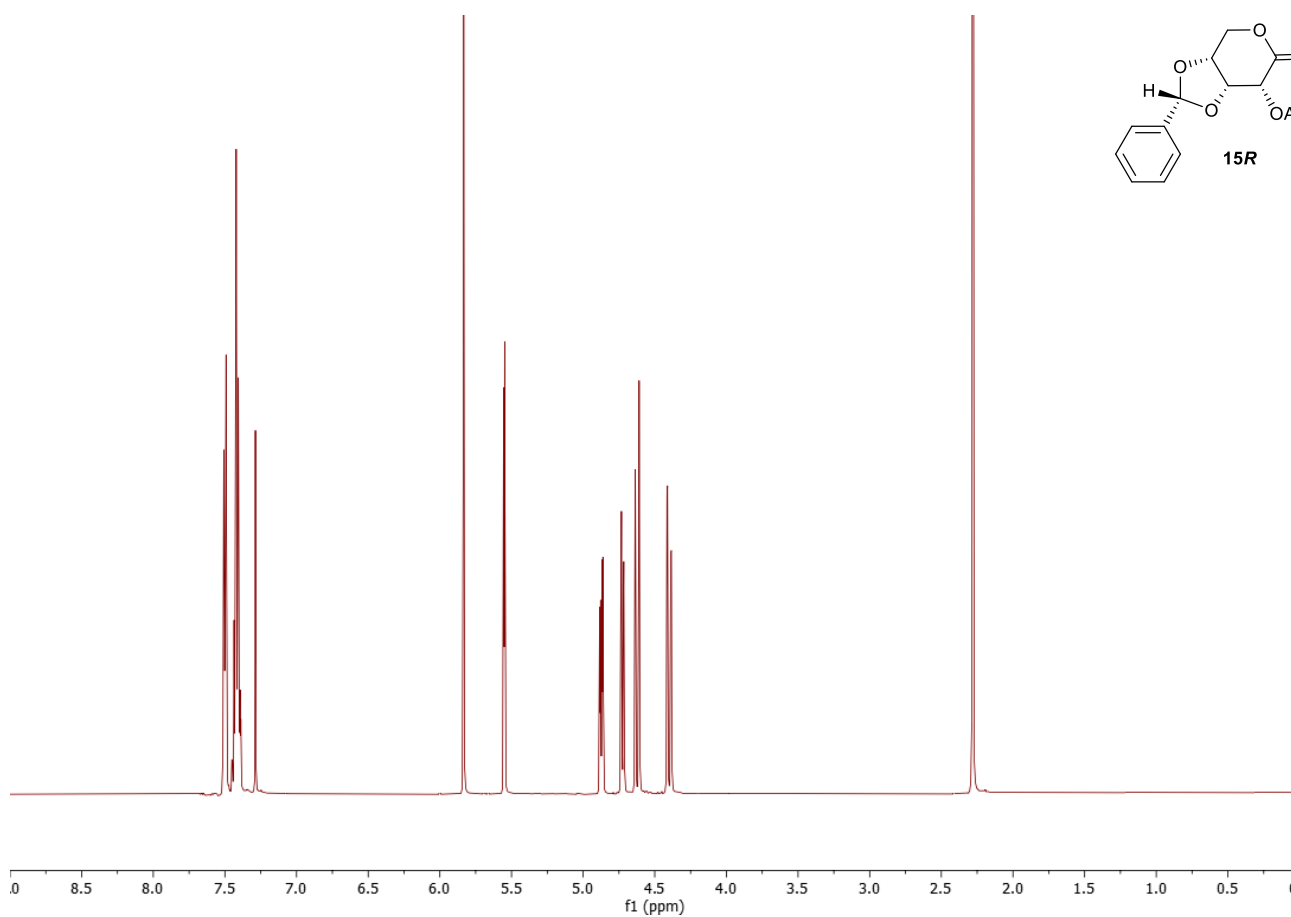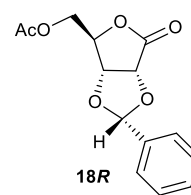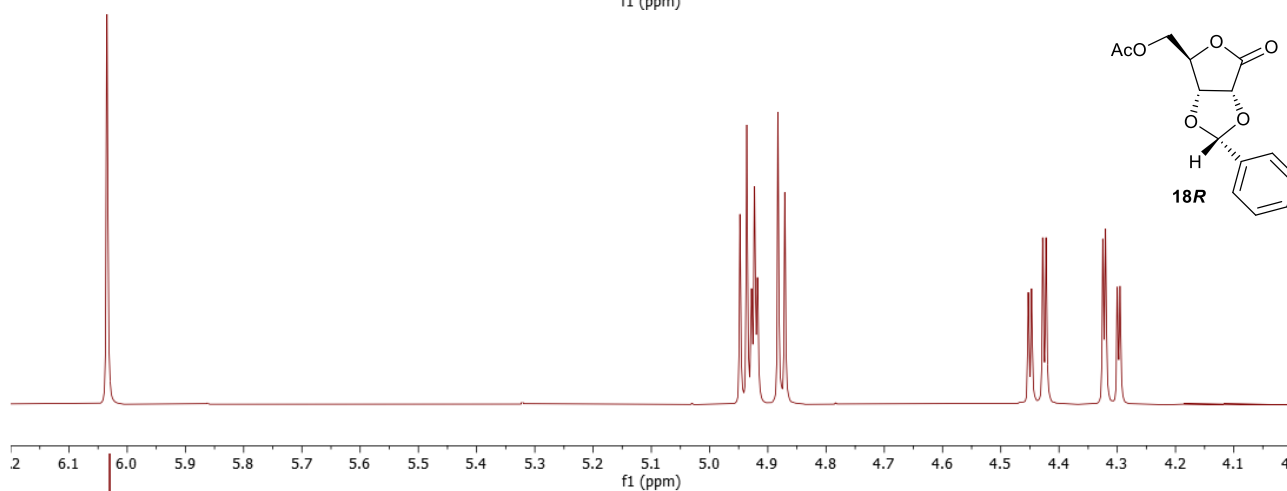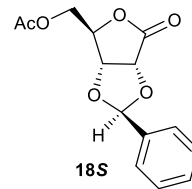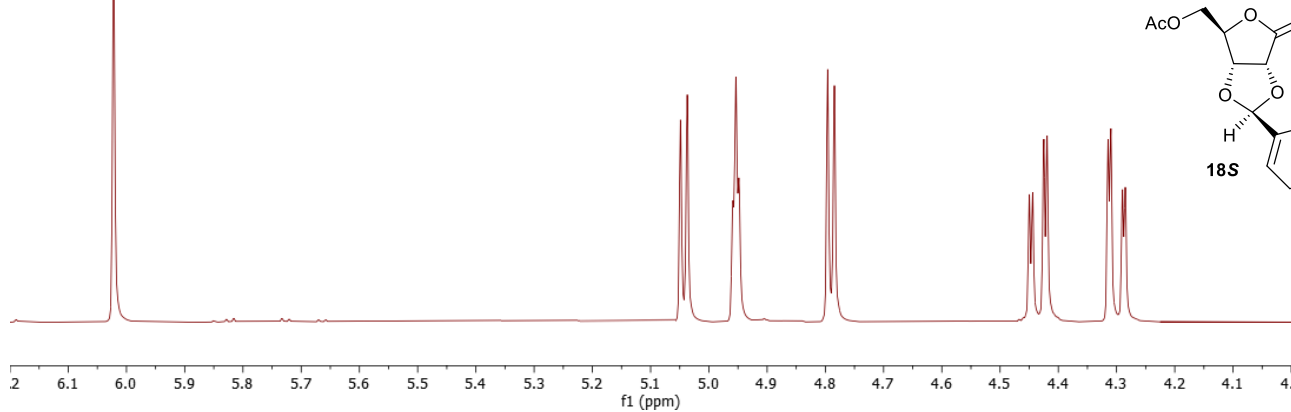

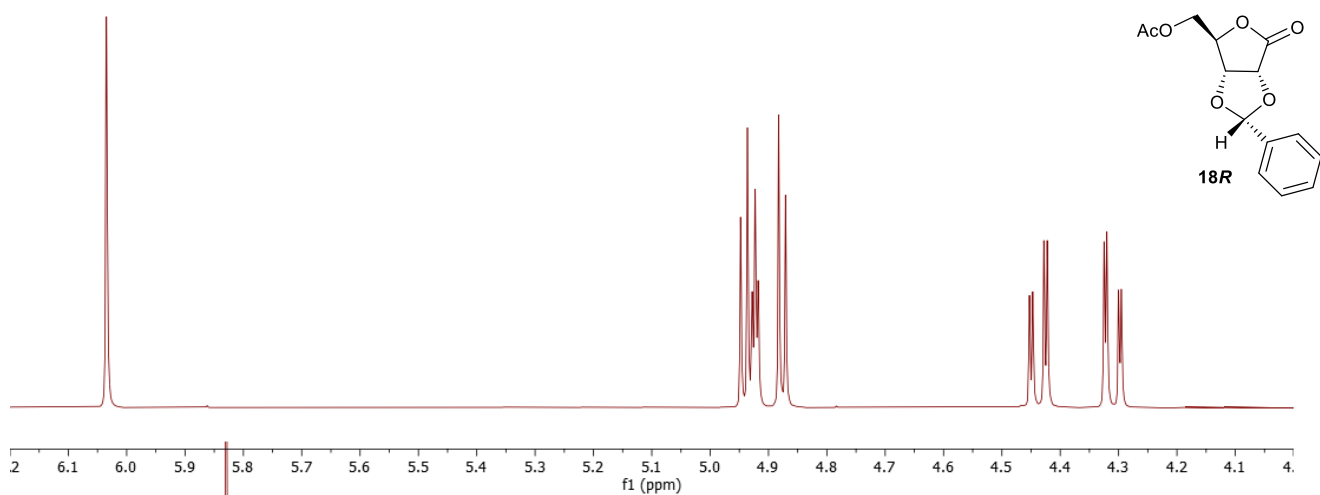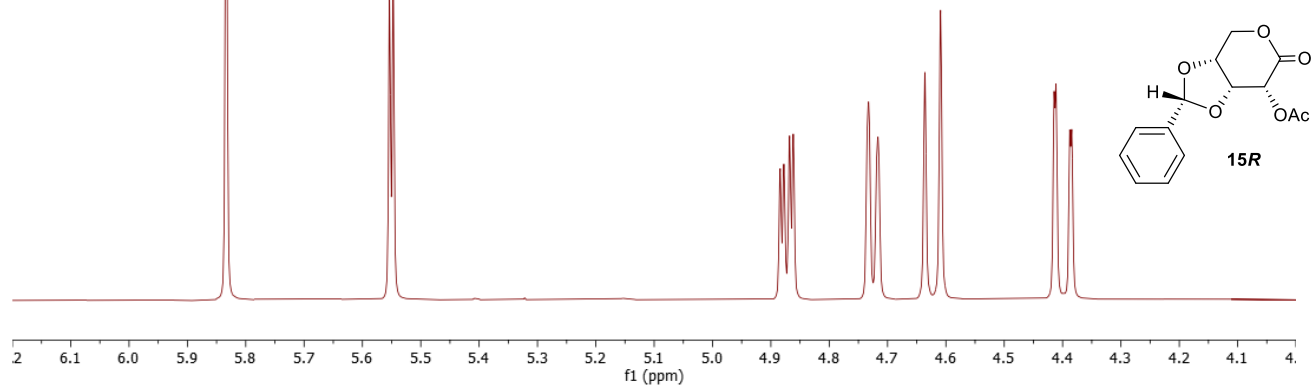



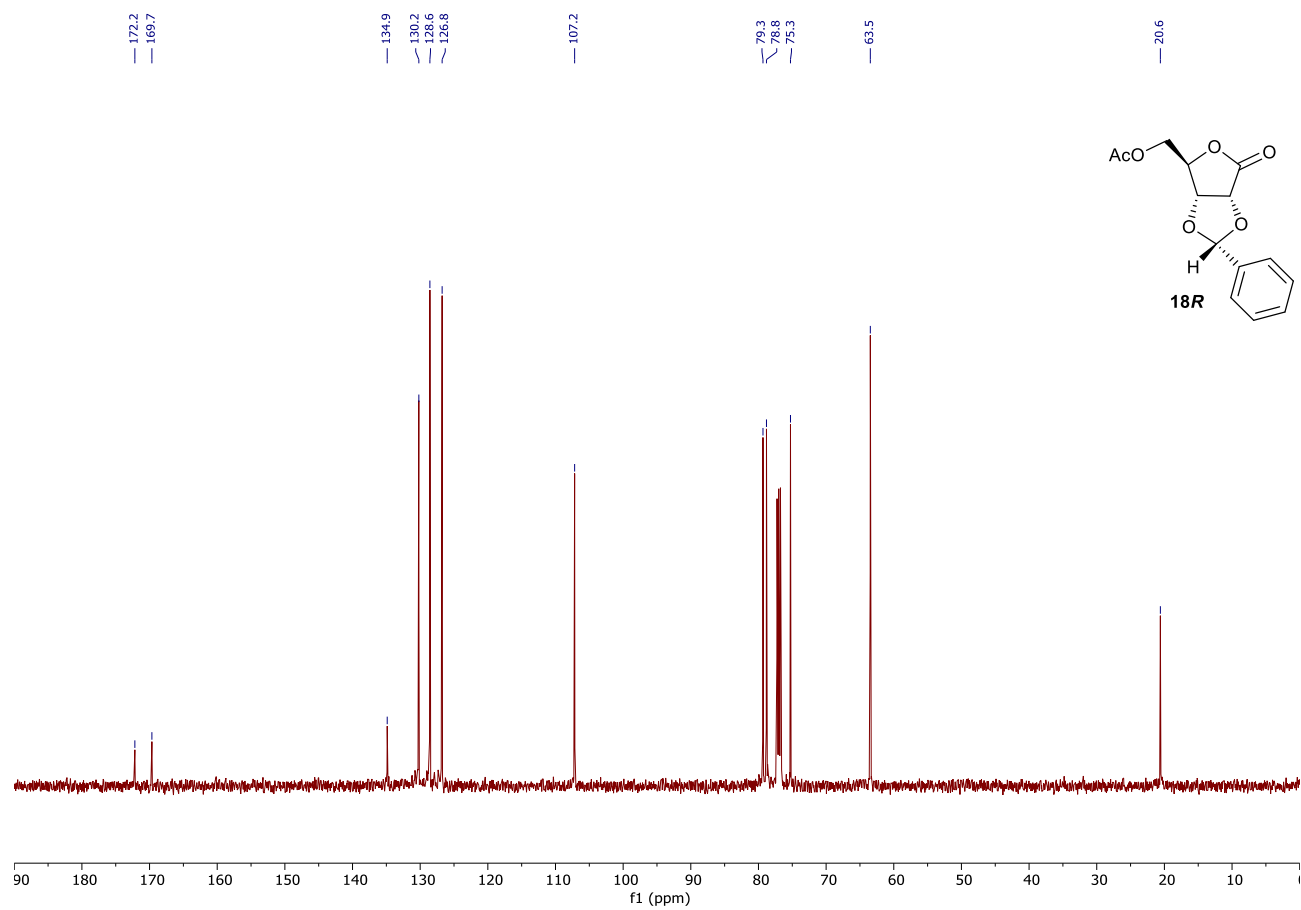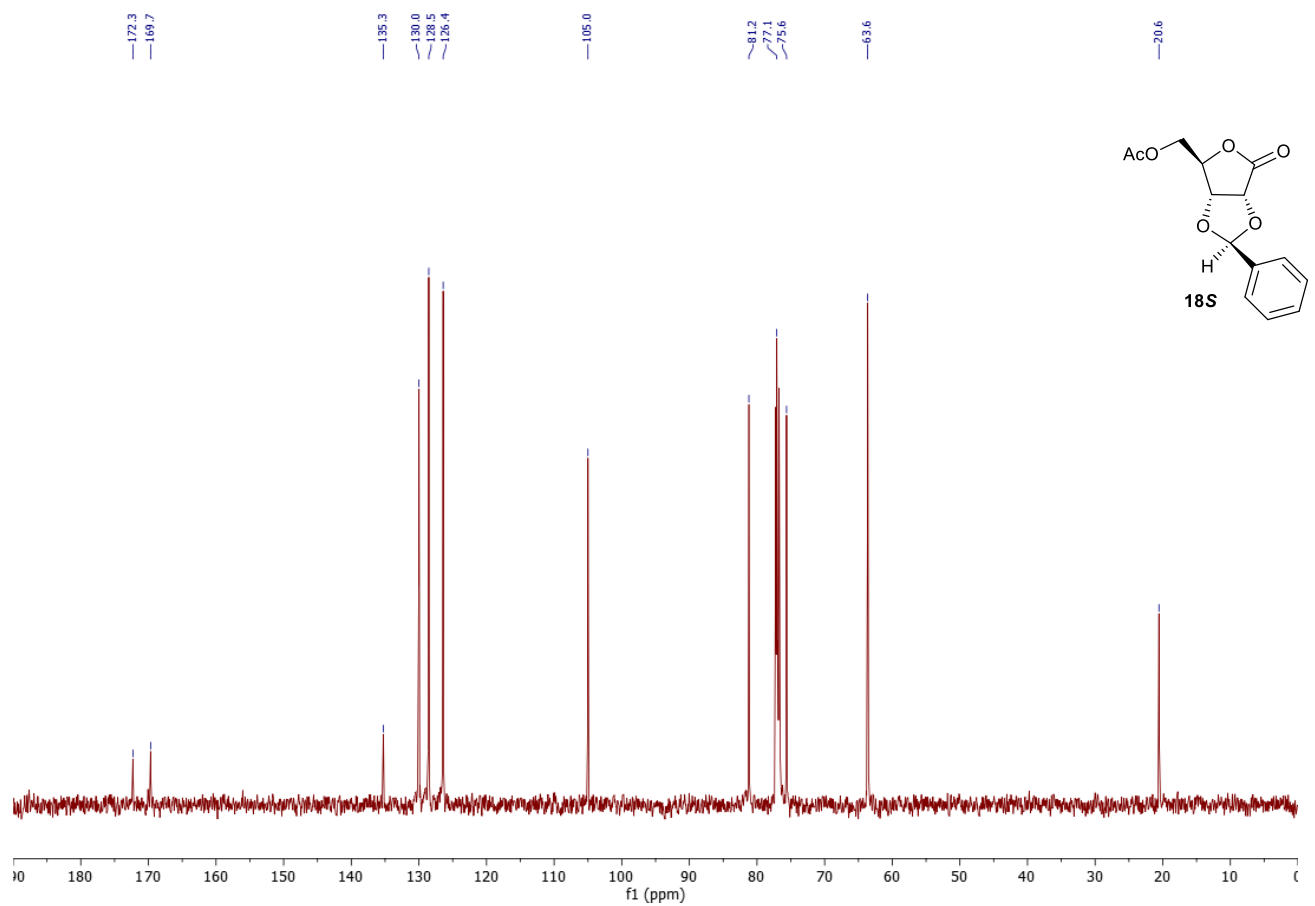

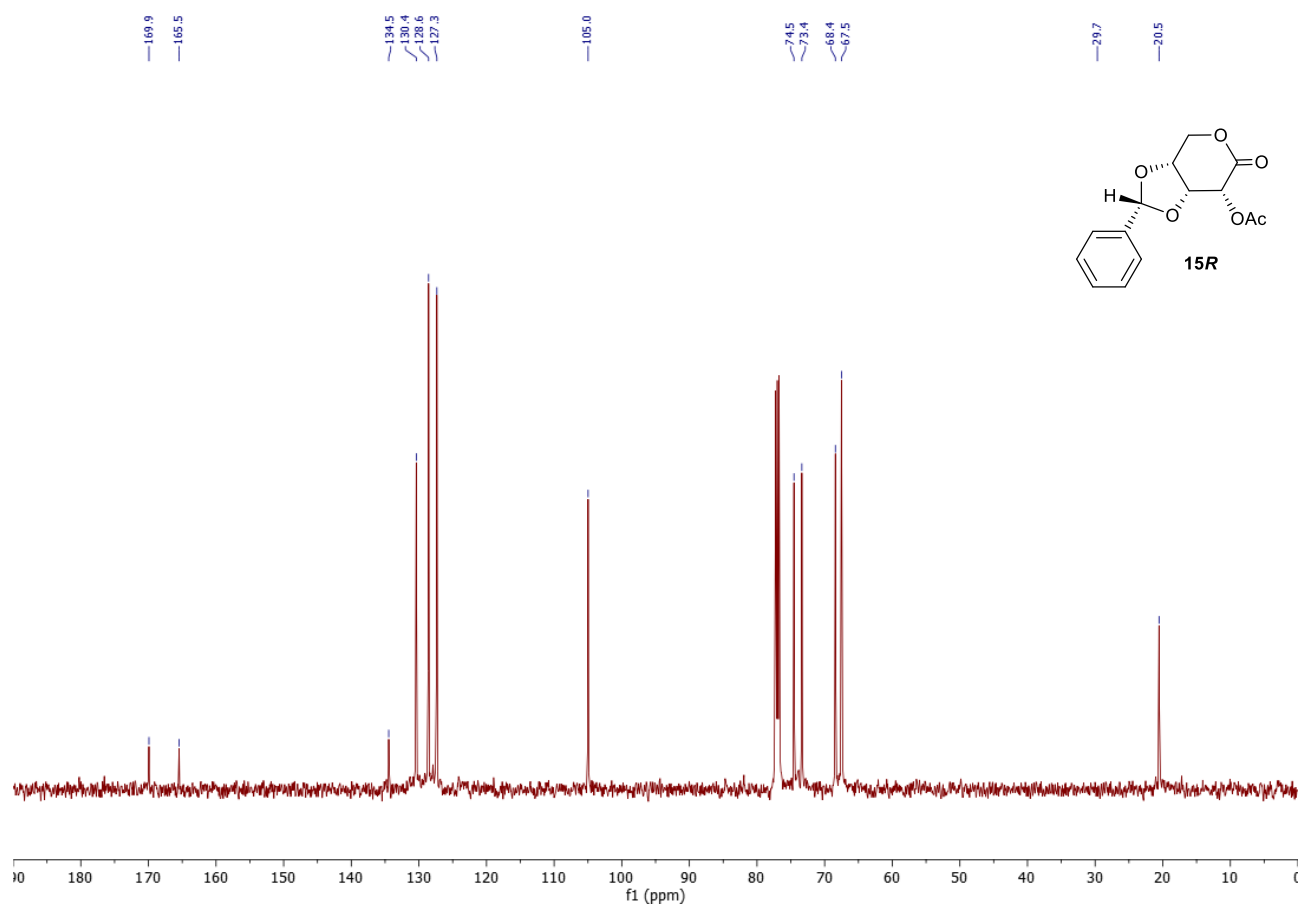

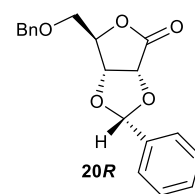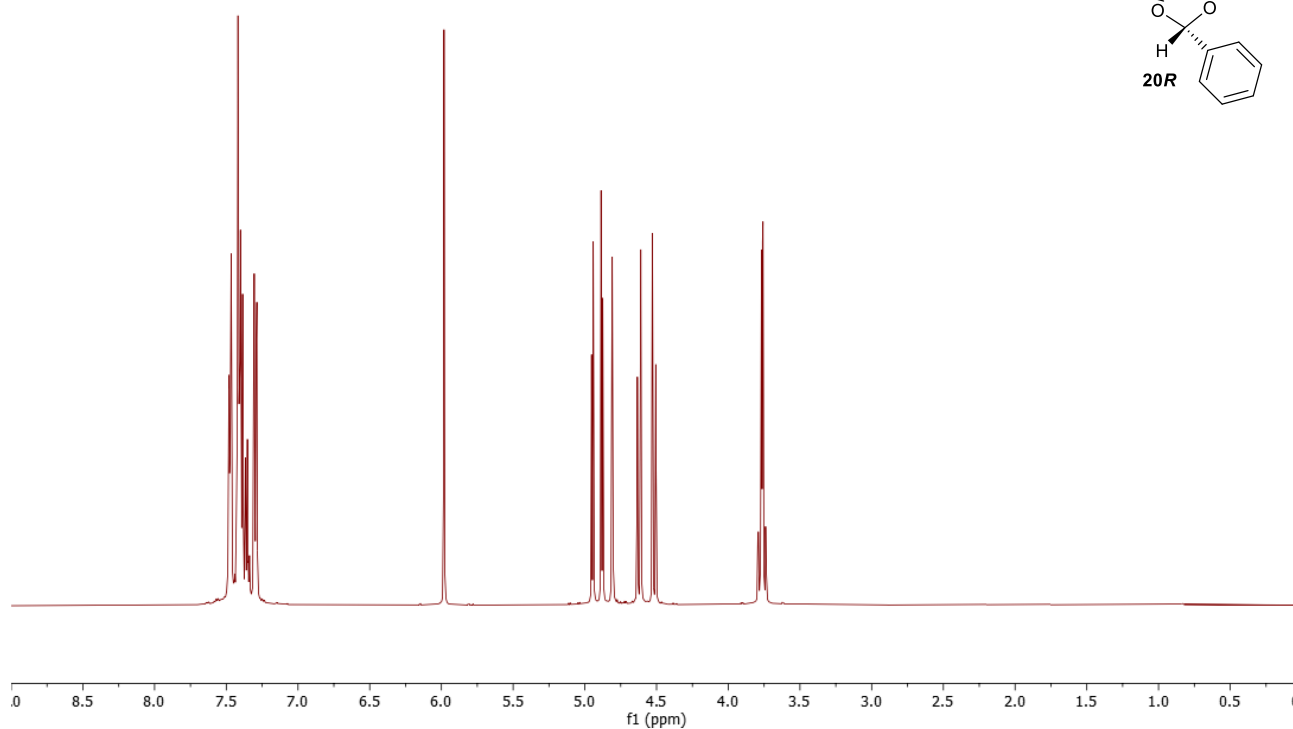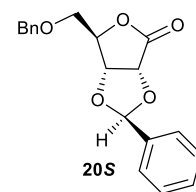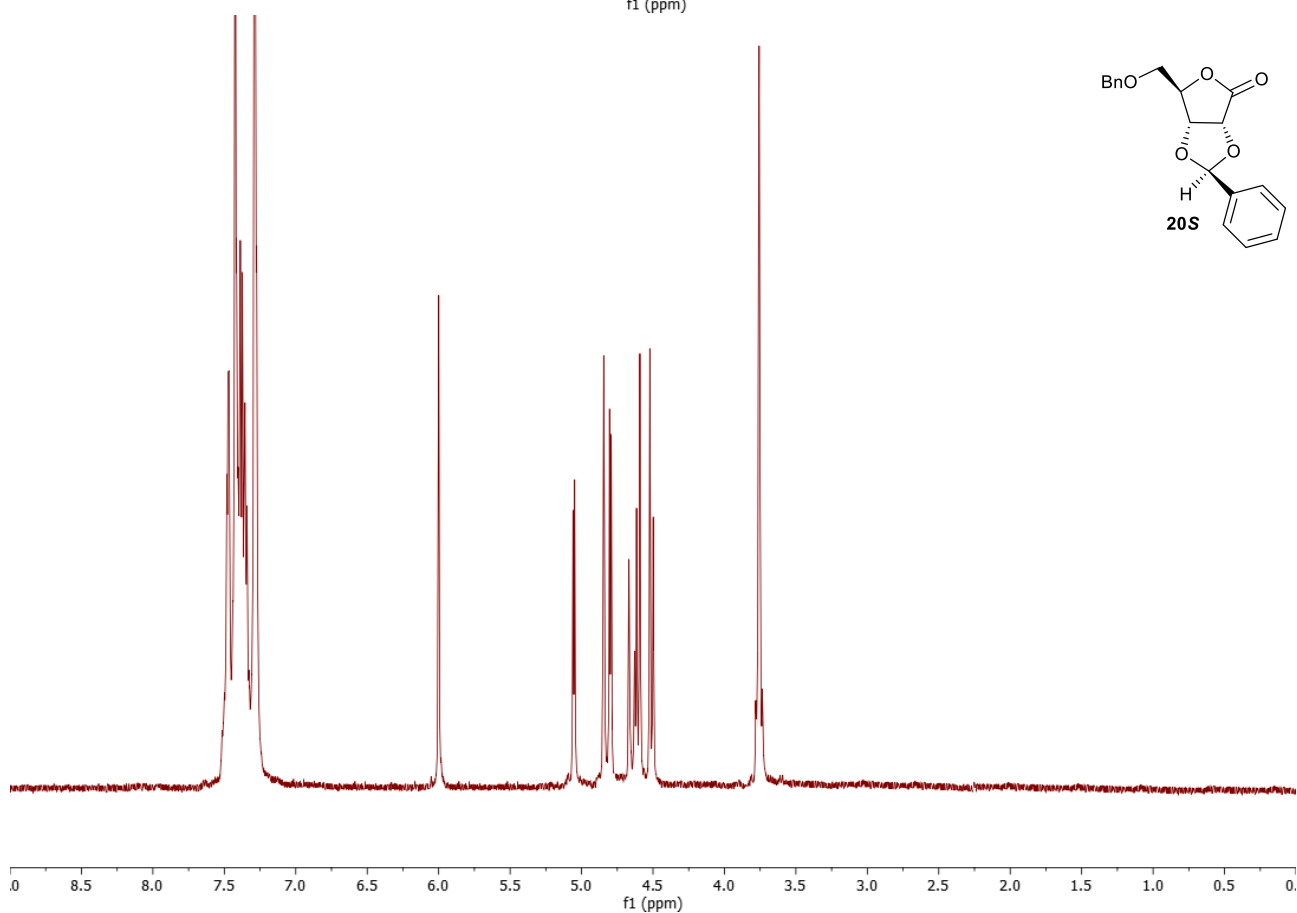

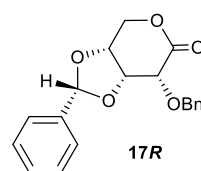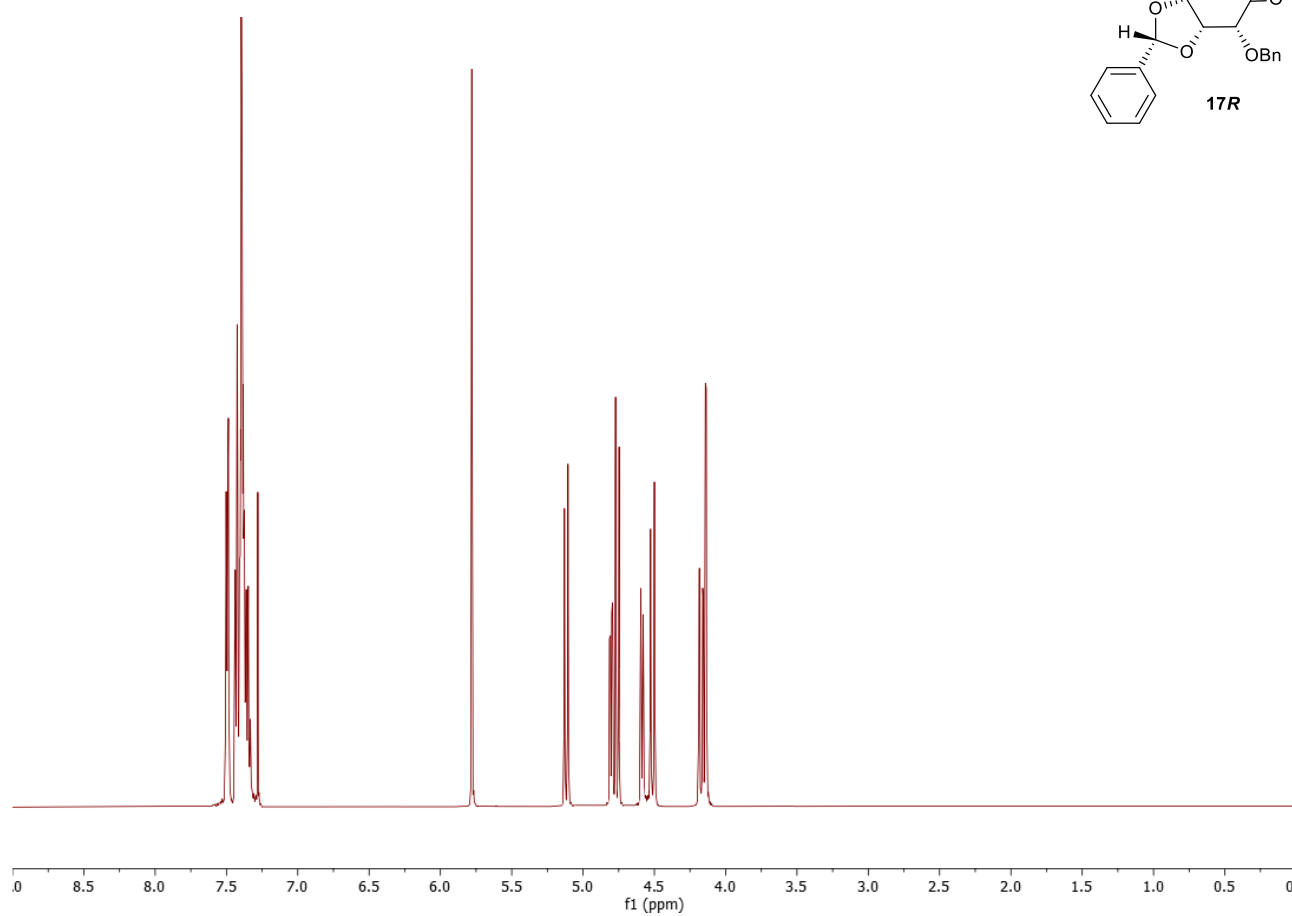

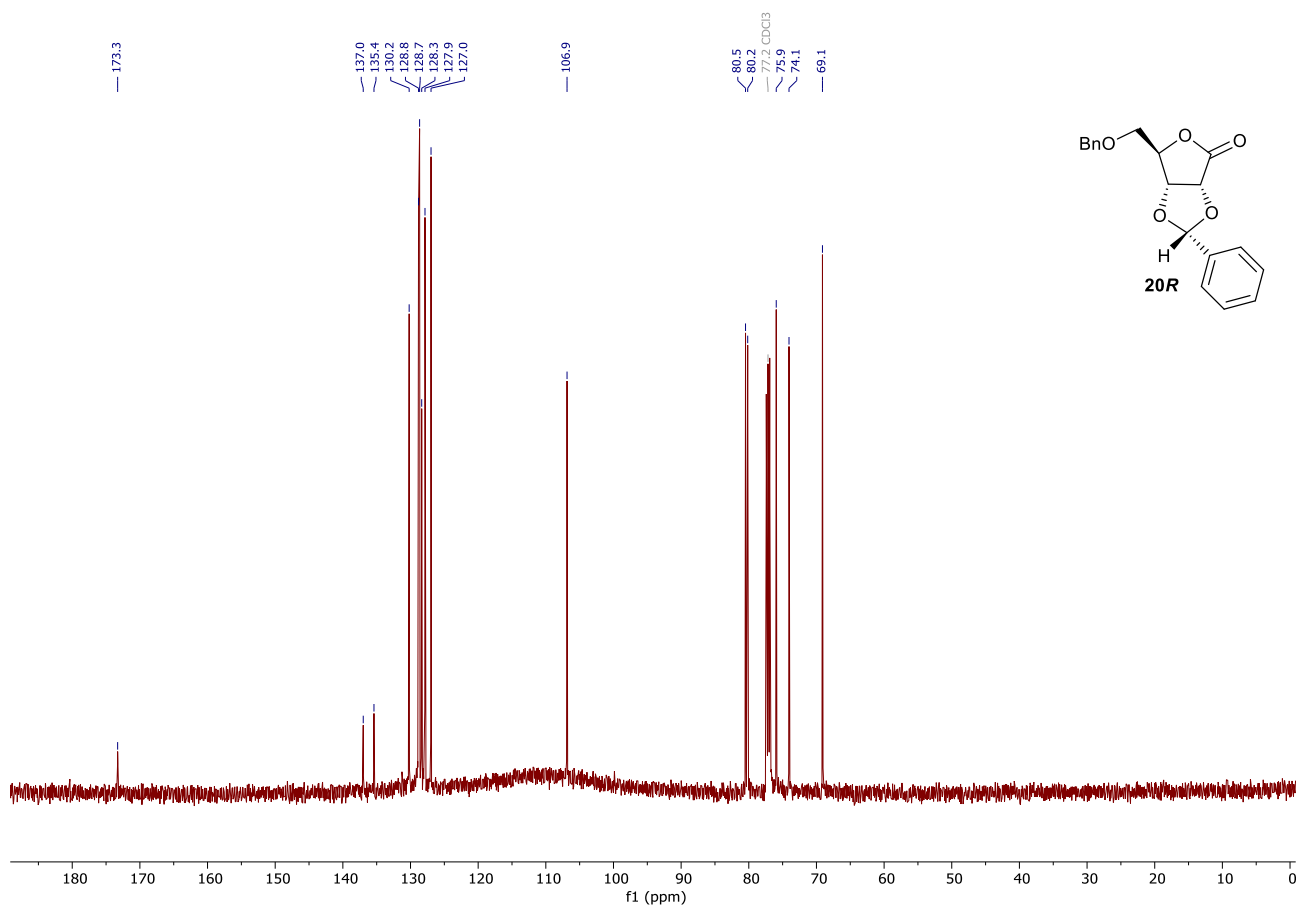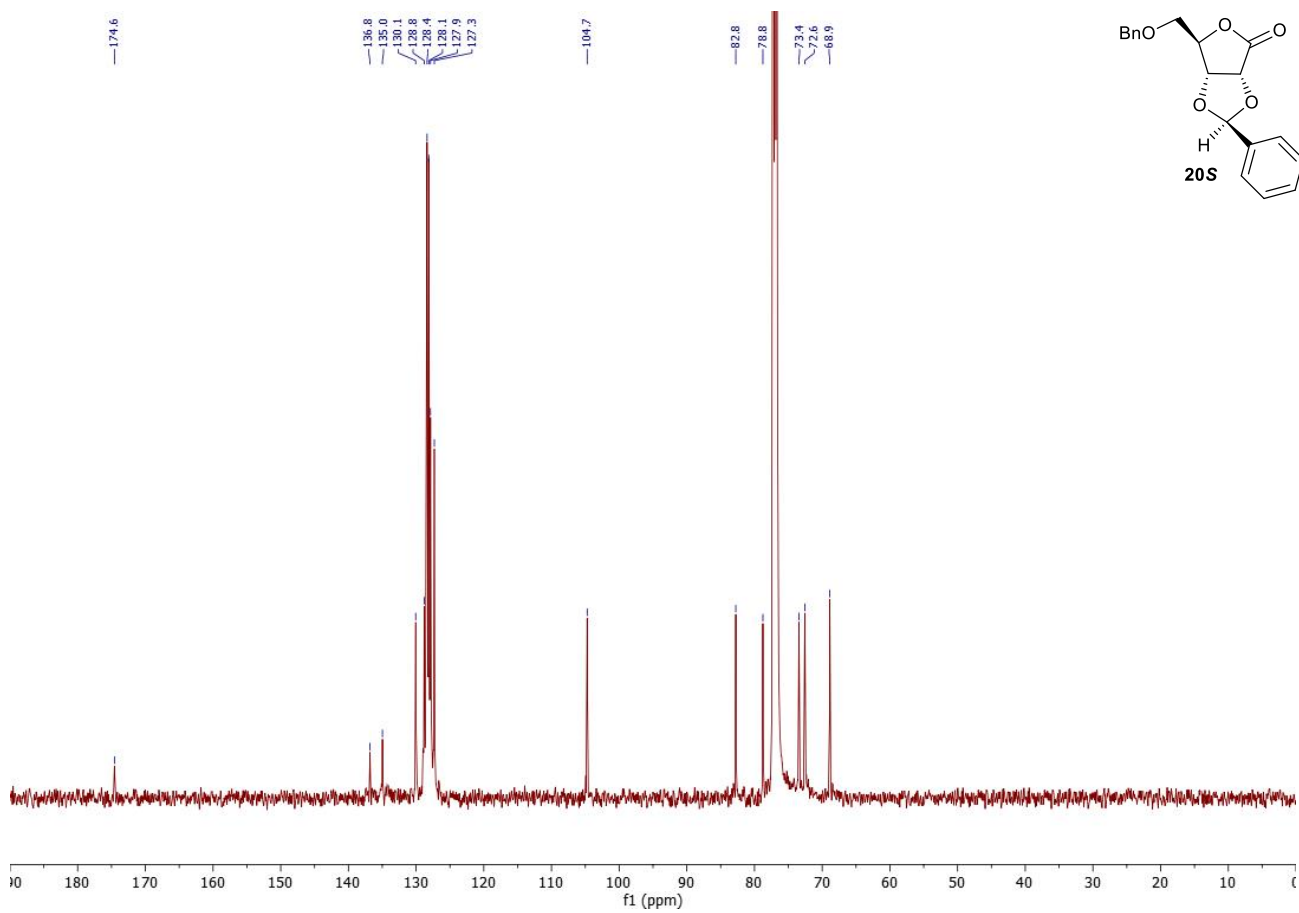

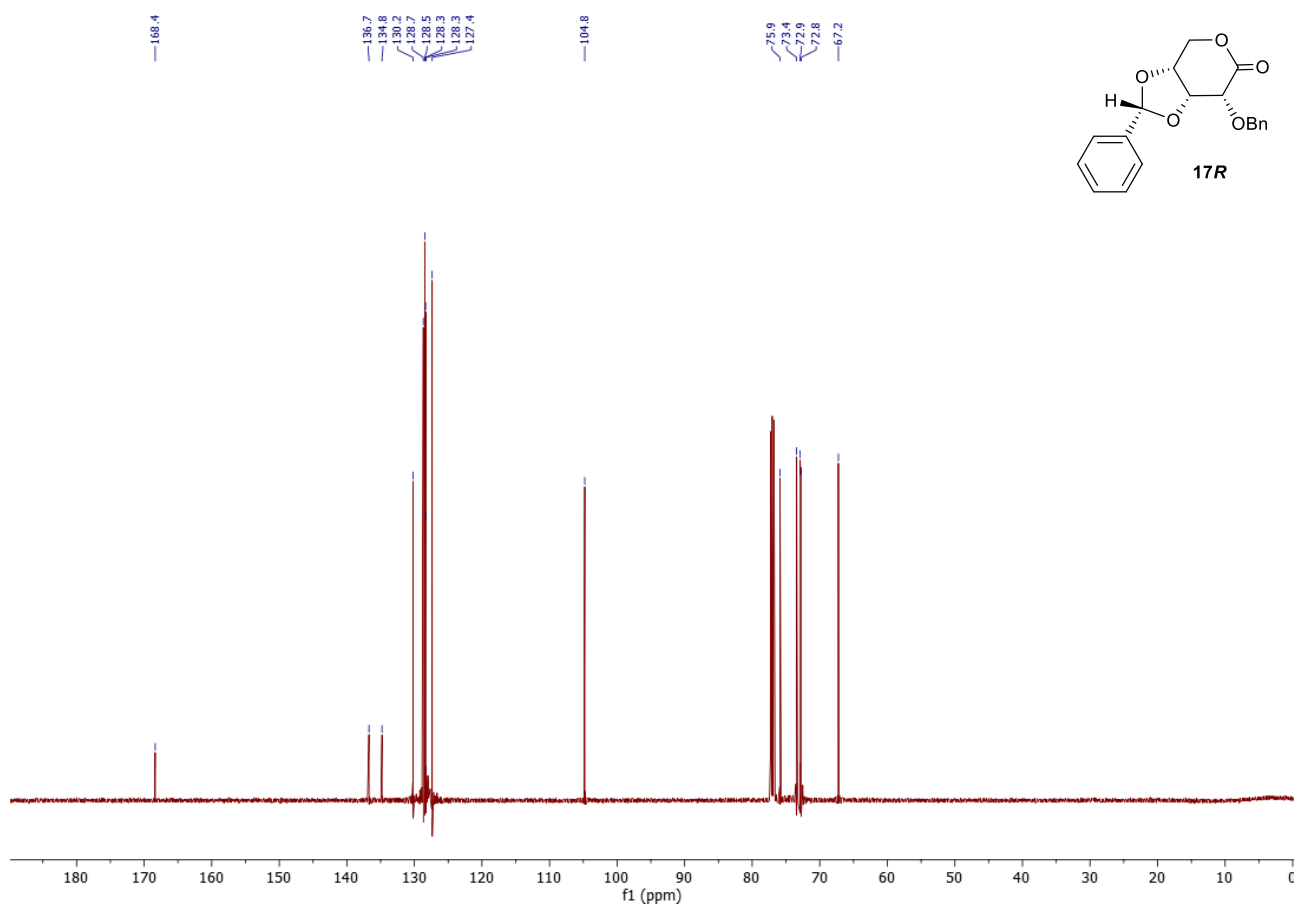

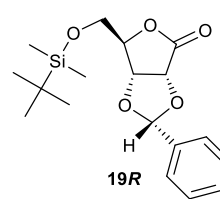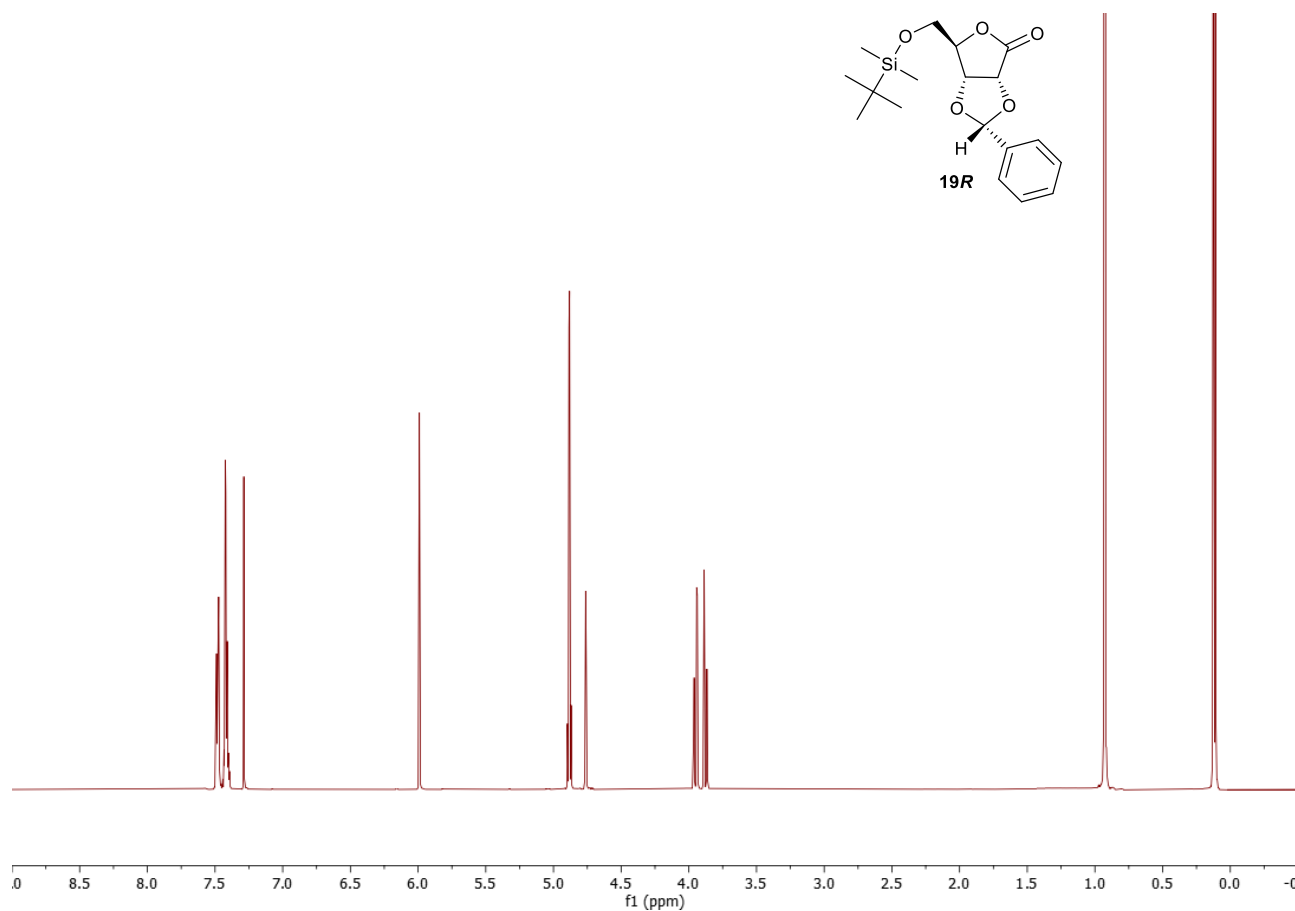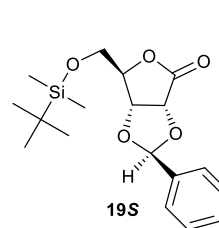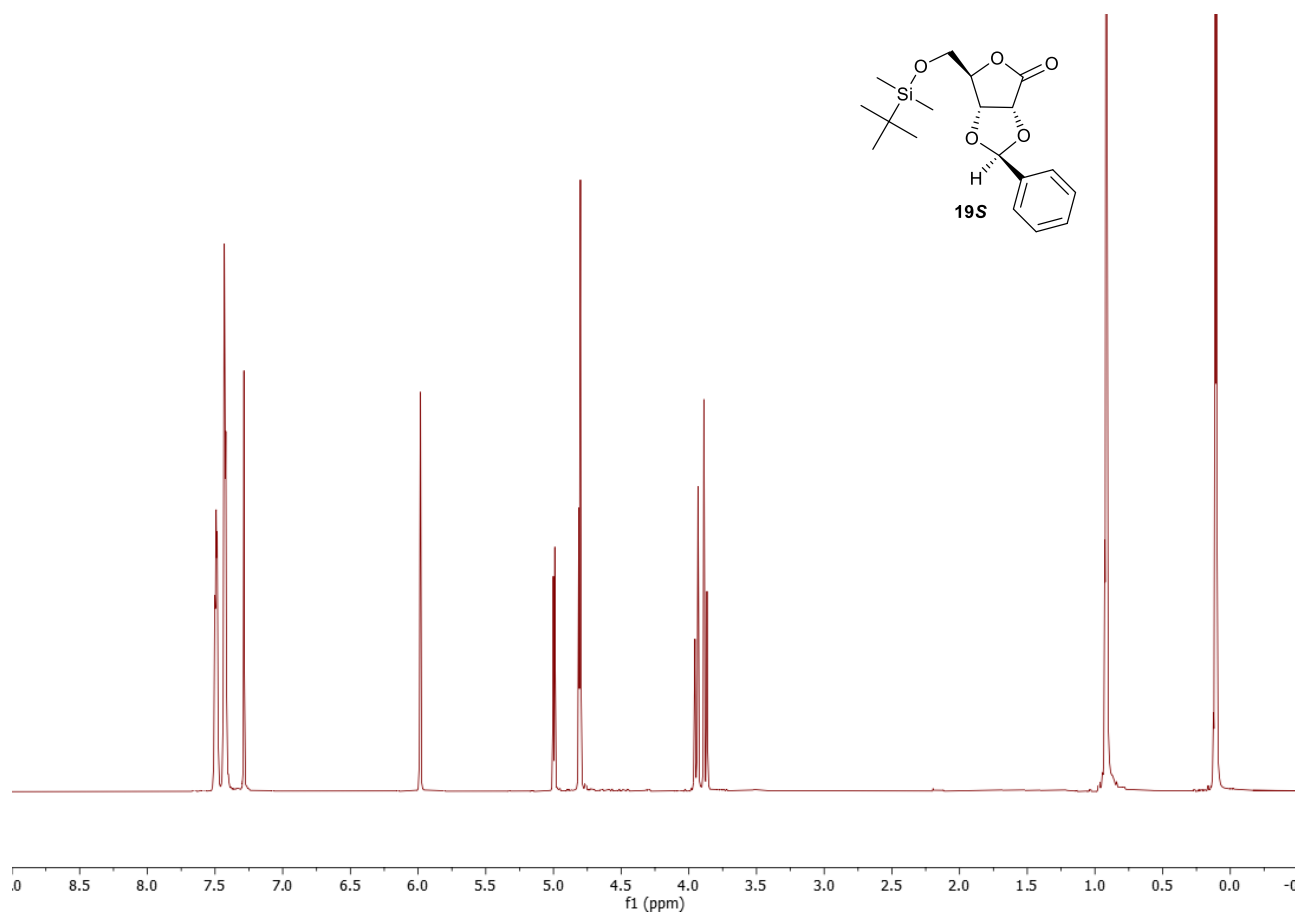

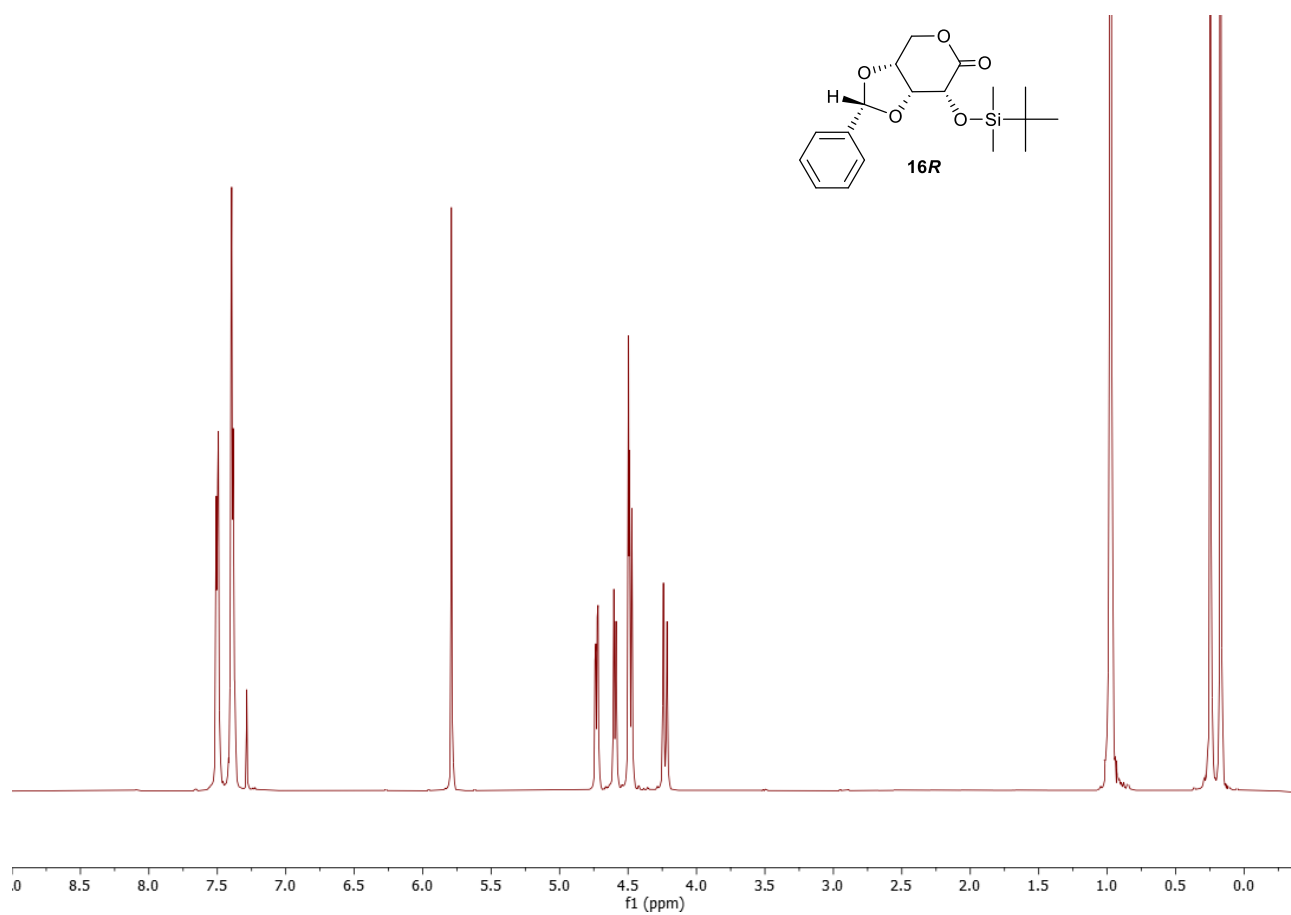

172.9 135.3 130.0 126.5 126.8 106.6 81.6 80.1 75.9 63.0 24.9 18.2 5.6 5.8

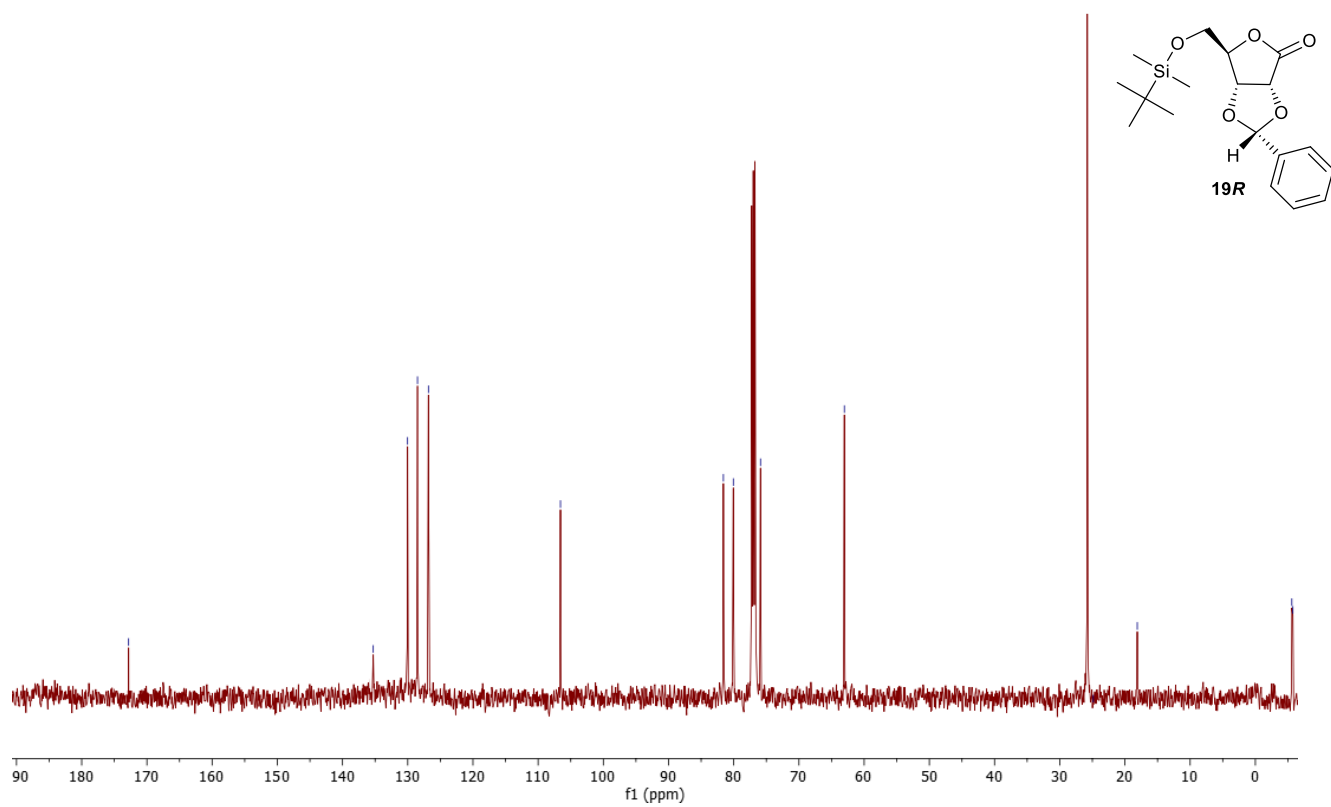



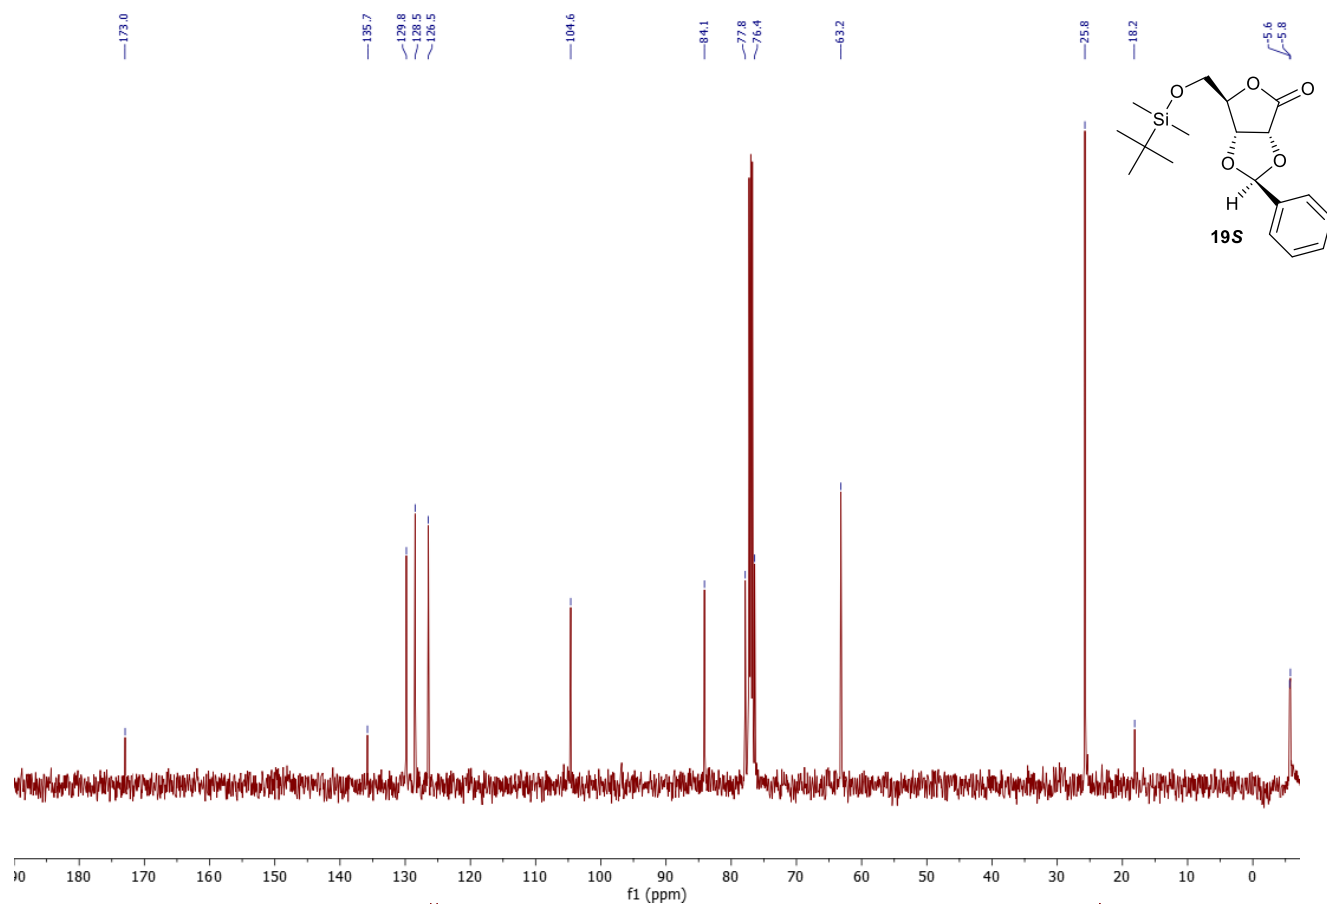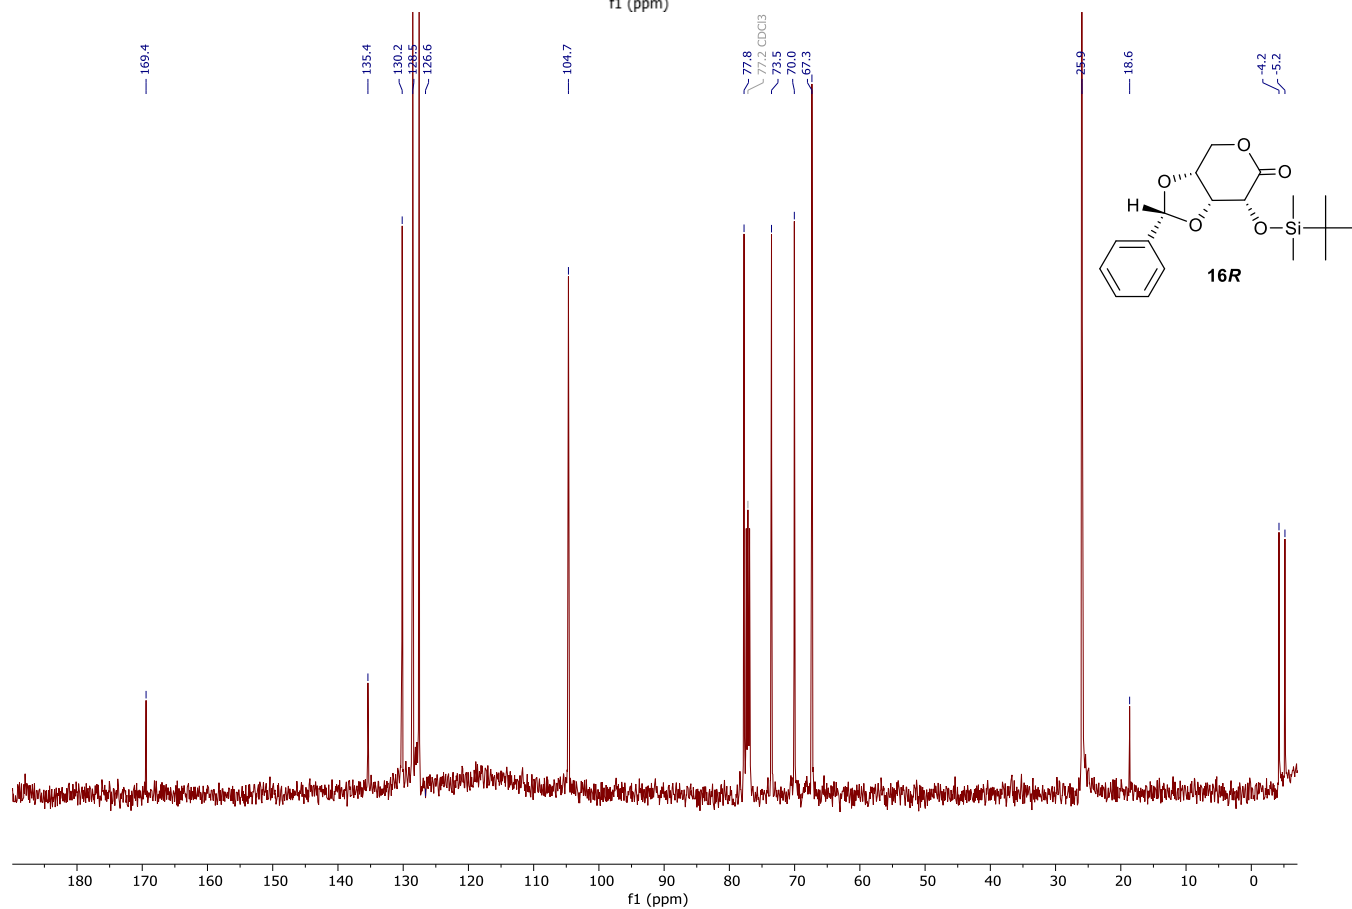

**Table S1.** Energies (E), relative energies ( $\Delta E$ ) in kJ/mol and Boltzmann population distribution at 298 K of conformers of the compound **12R**, in a range of 50 kJ/mol (12 kcal/mol), calculated with a hybrid DFT (B3LYP) approach with 6-31G\* basis set using SM8 (DMSO) solvation model.

| E (kJ/mol)  | $\Delta E$ (kJ/mol) | % in the population   |
|-------------|---------------------|-----------------------|
| -2207062.42 | 0.00                | 99.99                 |
| -2207039.64 | 22.78               | $1.00 \times 10^{-4}$ |
| -2207031.86 | 30.56               | $4.30 \times 10^{-6}$ |
| -2207026.05 | 36.37               | $4.11 \times 10^{-7}$ |
| -2207025.94 | 36.48               | $3.93 \times 10^{-7}$ |
| -2207019.50 | 42.92               | $2.90 \times 10^{-8}$ |

**Table S2.** Energies (E), relative energies ( $\Delta E$ ) in kJ/mol and Boltzmann population distribution at 298 K of conformers of the compound **12S**, in a range of 50 kJ/mol (12 kcal/mol), calculated with a hybrid DFT (B3LYP) approach with 6-31G\* basis set using SM8 (DMSO) solvation model.

| E (kJ/mol)  | $\Delta E$ (kJ/mol) | % in the population   |
|-------------|---------------------|-----------------------|
| -2207059.06 | 0.00                | 99.94                 |
| -2207038.82 | 20.24               | 0.028                 |
| -2207038.68 | 20.39               | 0.027                 |
| -2207027.14 | 31.92               | $2.56 \times 10^{-4}$ |
| -2207027.08 | 31.98               | $2.50 \times 10^{-4}$ |
| -2207022.11 | 36.95               | $3.36 \times 10^{-5}$ |
| -2207021.70 | 37.36               | $2.84 \times 10^{-5}$ |

**Table S3.** Energies (E), relative energies ( $\Delta E$ ) in kJ/mol and Boltzmann population distribution at 298 K of conformers of the compound **11R**, in a range of 50 kJ/mol (12 kcal/mol), calculated with a hybrid DFT (B3LYP) approach with 6-31G\* basis set using SM8 (CHCl<sub>3</sub>) solvation model.

| E (kJ/mol)  | $\Delta E$ (kJ/mol) | % in the population |
|-------------|---------------------|---------------------|
| -2207031.58 | 0.00                | 84.42               |
| -2207026.44 | 5.14                | 10.63               |
| -2207022.56 | 9.02                | 2.22                |
| -2207022.02 | 9.56                | 1.78                |
| -2207020.38 | 11.21               | 0.92                |
| -2207011.68 | 19.90               | 0.03                |

**Table S4.** Energies (E), relative energies ( $\Delta E$ ) in kJ/mol and Boltzmann population distribution at 298 K of conformers of the compound **11S**, in a range of 50 kJ/mol (12 kcal/mol), calculated with a hybrid DFT (B3LYP) approach with 6-31G\* basis set using SM8 (CHCl<sub>3</sub>) solvation model.

| E (kJ/mol)  | $\Delta E$ (kJ/mol) | % in the population |
|-------------|---------------------|---------------------|
| -2207029.90 | 0.00                | 62.68               |
| -2207027.67 | 2.23                | 25.45               |
| -2207025.27 | 4.63                | 9.68                |
| -2207020.40 | 9.50                | 1.36                |
| -2207018.62 | 11.28               | 0.66                |
| -2207015.21 | 14.69               | 0.17                |
